# Supplementary material for: Pleiotropic ZIP8 A391T implicates abnormal manganese homeostasis in complex human disease
Source: JCI journal article supplement (doi:10.1172/jci.insight.140978), 2020-09-08
Supplement: sd6 [file 6]

|                    | Zip8 iKO | Zip8 iKO<br>Het | Zip8 LSKO | Zip8 393T-KI<br>Het | Zip8 393T-KI<br>Hom |
|--------------------|----------|-----------------|-----------|---------------------|---------------------|
| Liver              | -77%     | -39%            | -69%      | -19%                | -28%                |
| Kidney             | -52%     | -32%            | -49%      | -17%                | -21%                |
| Brain              | -31%     | -23%            | -34%      | N.S.                | N.S.                |
| Heart              | -27%     | -14%            | -47%      | N.S.                | N.S.                |
| Small<br>intestine | N.S.     | +34%            | N.S.      | N.S.                | N.S.                |
| Whole<br>blood     | N.R.     | N.R.            | -65%      | N.S.                | -18.9%              |

**Supplemental Table 5.** Percent change of tissue and blood Mn in male Zip8 inducible global (iKO) and liver-specific (LSKO) knockout mice and Zip8 393T-KI heterozygous and homozygous mice compared to age and sex-matched controls. The data for the iKO and LSKO models (12-14 weeks of age) are taken from previous publication (Lin, et al., *JCI*, 2017; PMID 28481222). The Zip8 393T-KI mice were 9-14 weeks for whole blood Mn measurements; 8-10 weeks for tissue measurements. N.R., not reported; N.S., non-significant.
